# Supplementary material for: Polymorphisms of the Proinflammatory Cytokine Genes Modulate the Response to NSAIDs but Not to Triptans in Migraine Attacks
Source: MDPI journal article supplement (doi:10.3390/ijms24010657), 2022-12-30

## Supplementary Materials

**Supplementary Table S1.** Employment status of patients with migraine. Data are displayed as number and percentage. <sup>a</sup> Chi-square test.

| Employment        | Total (N=313) | Male (N=96) | Female (N= 217) | P value <sup>a</sup> |
|-------------------|---------------|-------------|-----------------|----------------------|
| <b>Paid</b>       | 155 (49.5%)   | 56 (58.4%)  | 99 (45.9%)      | 0.029                |
| <b>Self</b>       | 23 (7.4%)     | 5 (5.2%)    | 18 (8.3%)       |                      |
| <b>Unemployed</b> | 16 (5.1%)     | –           | 16 (7.5%)       |                      |
| <b>Student</b>    | 28 (8.9%)     | 10 (10.4%)  | 18 (8.3%)       |                      |
| <b>Retired</b>    | 39 (12.5%)    | 8 (8.3%)    | 31 (14.2%)      |                      |
| <b>Other</b>      | 52 (16.6%)    | 17 (17.7%)  | 35 (15.8%)      |                      |

**Supplementary Table S2.** Education levels of patients with migraine. Data are displayed as number and percentage. <sup>a</sup> Chi-square test.

| Education         | Total (N=313) | Male (N=96) | Female (N=217) | P value <sup>a</sup> |
|-------------------|---------------|-------------|----------------|----------------------|
| <b>Primary</b>    | 31 (9.9%)     | 12 (12.5%)  | 19 (8.9%)      | 0.250                |
| <b>Middle</b>     | 102 (32.6%)   | 29 (30.2%)  | 73 (33.5%)     |                      |
| <b>High</b>       | 153 (48.9%)   | 43 (44.8%)  | 110 (50.5%)    |                      |
| <b>University</b> | 27 (8.6%)     | 12 (12.5%)  | 15 (7.1%)      |                      |

**Supplementary Table S3.** Psychometric tests of patients with migraine. Data are displayed as mean ± standard deviation. <sup>a</sup>Unpaired t-test.

|                                         | Male (N=96)   | Female (N=217) | P value <sup>a</sup> |
|-----------------------------------------|---------------|----------------|----------------------|
| <b>Beck Depression Inventory</b>        | 8.17 ± 3.39   | 10.74 ± 8.34   | 0.031                |
| <b>State Trait Anxiety Inventory X1</b> | 39.21 ± 10.69 | 40.89 ± 11.27  | 0.311                |
| <b>State Trait Anxiety Inventory X2</b> | 42.95 ± 10.92 | 45.29 ± 10.92  | 0.146                |

**Supplementary Table S4.** Genotype frequencies (GF) of polymorphisms of *IL-1RN* (VNTR), in non-responders, responders and partial responders to NSAIDs and triptans. Data are displayed as count and percentage.

|                              | GF        |           |         |         |           |         |
|------------------------------|-----------|-----------|---------|---------|-----------|---------|
| <i>IL-1RN</i> (VNTR)         | 1/1 (%)   | 1/2 (%)   | 1/3 (%) | 1/4 (%) | 2/2 (%)   | 2/3 (%) |
| Non-responders to NSAIDs     | 34 (52.3) | 19 (29.2) | 5 (7.7) | 1 (1.5) | 5 (7.7)   | 1 (1.5) |
| Responders to NSAIDs         | 65 (52.8) | 38 (30.9) | 3 (2.4) | 3 (2.4) | 13 (10.6) | 1 (0.8) |
| Partial responders to NSAIDs | 61 (48.8) | 39 (31.2) | 5 (4.0) | 9 (7.2) | 11 (8.8)  | 0 (0)   |
| Non-responders to triptans   | 48 (60.0) | 22 (27.5) | 2 (2.5) | 2 (2.5) | 6 (7.5)   | 0 (0)   |

|                                |           |           |         |          |           |         |
|--------------------------------|-----------|-----------|---------|----------|-----------|---------|
| Responders to triptans         | 78 (47.0) | 52 (31.3) | 7 (4.2) | 10 (6.0) | 18 (10.8) | 1 (0.6) |
| Partial responders to triptans | 23 (52.3) | 13 (29.5) | 4 (9.1) | 0 (0)    | 3 (6.8)   | 1 (2.3) |

**Supplementary Figure S1.** Timeline and design of the study.

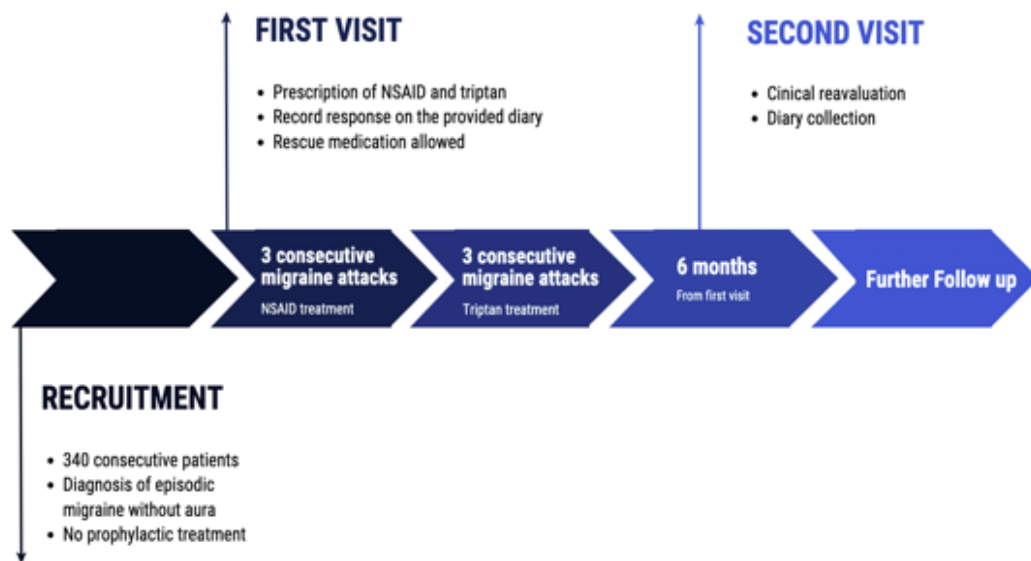

Supplement: s1 [file s1]
